# Supplementary material
Source: PubMed Central journal article supplement (PMC1976229)

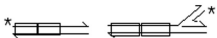

M S 0 2 6 24 48 S 0 2 6 24 48 M

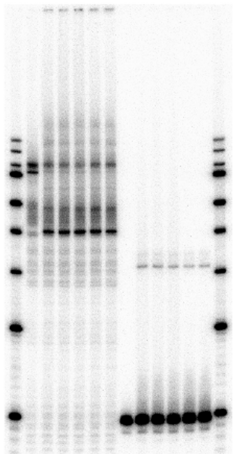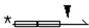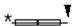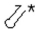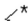

Supplement: pnas_0706556104_1.pdf [file pnas_0706556104_1.pdf]

WT

P167S

| Mg <sup>2+</sup> | WT |   |    |   |    | P167S |   |    |   |    |
|------------------|----|---|----|---|----|-------|---|----|---|----|
| Mg <sup>2+</sup> | -  | + | +  | - | -  | -     | + | +  | - | -  |
| Mn <sup>2+</sup> | -  | - | -  | + | +  | -     | - | -  | + | +  |
| Time (hr)        | 16 | 2 | 16 | 2 | 16 | 16    | 2 | 16 | 2 | 16 |

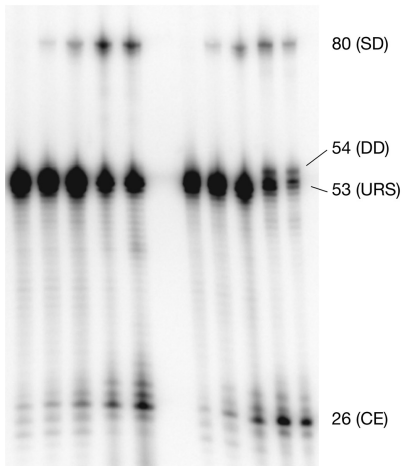

Supplement: pnas_0706556104_2.pdf [file pnas_0706556104_2.pdf]

**A**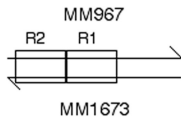**B**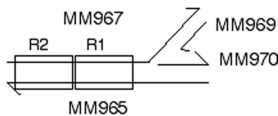**C**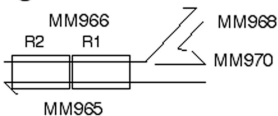**D**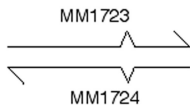**E**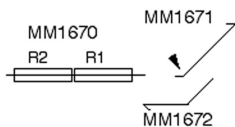**F**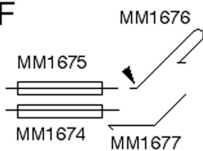**G**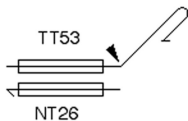**H**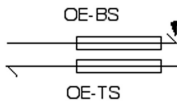**I**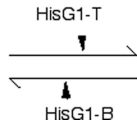

Supplement: pnas_0706556104_3.pdf [file pnas_0706556104_3.pdf]
